# Supplementary material for: Human neural stem cell-derived neuron/astrocyte co-cultures respond to La Crosse virus infection with proinflammatory cytokines and chemokines
Source: PubMed Central journal article supplement (PMC6236894; doi:10.1186/s12974-018-1356-5), 2018-11-15
Supplement: 12974_2018_1356_MOESM2_ESM.pdf [file 12974_2018_1356_MOESM2_ESM.pdf]

# Additional Figure 2

a.)

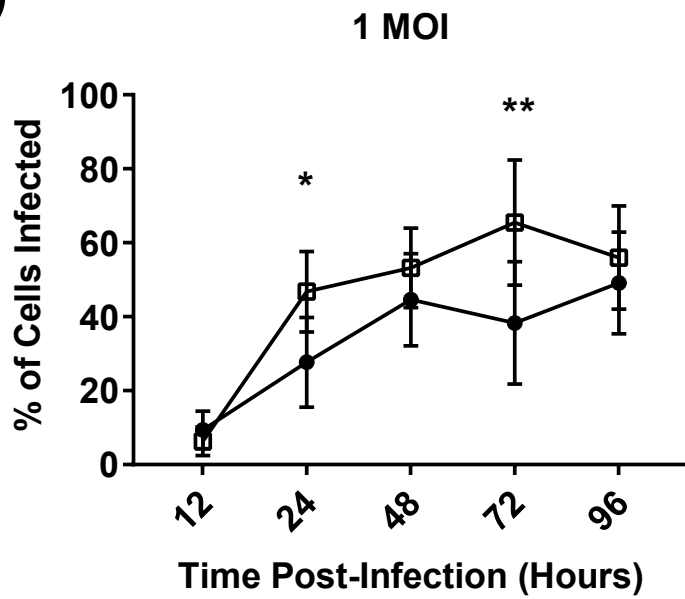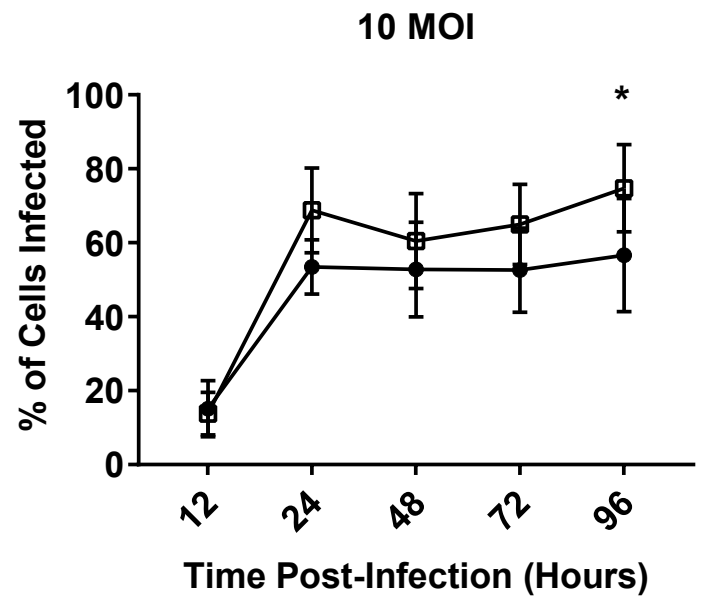

b.)

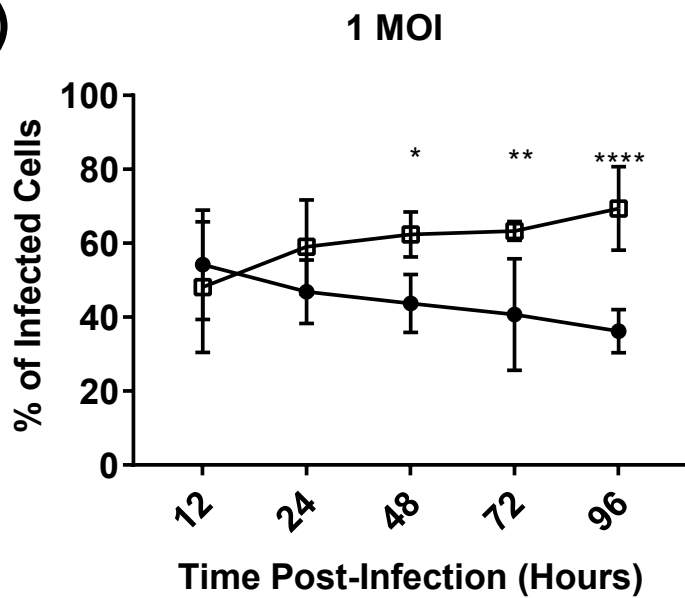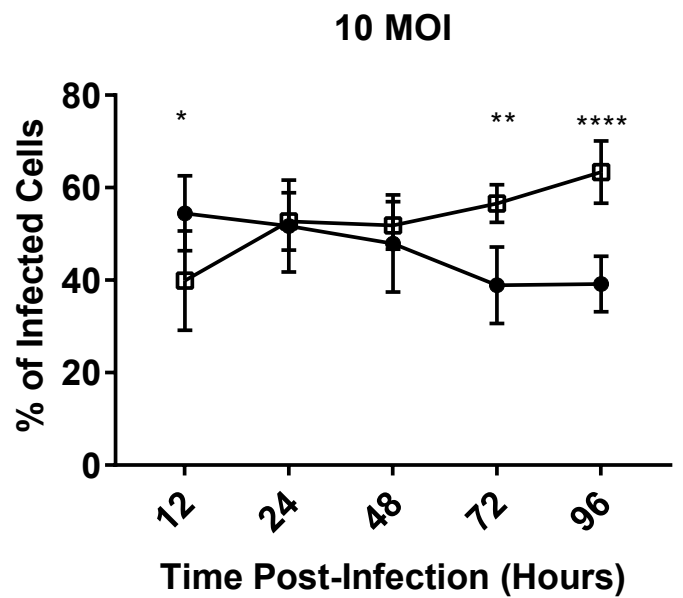

● GFAP    □ MAP2
